# Supplementary material for: Non-suicidal self-injury in Shanghai inner bound middle school students
Source: PubMed Central journal article supplement — Gen Psychiatr. 2019 Aug 24;32(4):e100083. doi: 10.1136/gpsych-2019-100083 (PMC6738666; doi:10.1136/gpsych-2019-100083), 2019-08-24
Supplement: gpsych-2019-100083supp001.pdf [file gpsych-2019-100083supp001.pdf]

上海市精神卫生中心伦理委员会

IRB, Shanghai Mental Health Center

## 伦理审查批准函 SMHC-IRB Approval Letter

批件号: 2014-24

|             |                                                                                                                                                                                                                                                                                                                                                                                                                                          |
|-------------|------------------------------------------------------------------------------------------------------------------------------------------------------------------------------------------------------------------------------------------------------------------------------------------------------------------------------------------------------------------------------------------------------------------------------------------|
| 审查日期        | 2014.10.22                                                                                                                                                                                                                                                                                                                                                                                                                               |
| 审查会议地点      | 上海市精神卫生中心二号楼五楼第二会议室                                                                                                                                                                                                                                                                                                                                                                                                                      |
| 研究项目名称      | 上海初中生隐匿性自伤行为现状和相关危险因素的调查研究                                                                                                                                                                                                                                                                                                                                                                                                               |
| 审查文件        | 临床研究方案(版本: 01, 2014年10月13); 受试者须知和知情同意(版本号: 01, 版本时间: 2014年10月13); 主要研究者简历及研究人员名单                                                                                                                                                                                                                                                                                                                                                        |
| 申办者         | 上海市精神卫生中心                                                                                                                                                                                                                                                                                                                                                                                                                                |
| 临床研究单位      | 上海市精神卫生中心                                                                                                                                                                                                                                                                                                                                                                                                                                |
| 主要研究者       | 程文红                                                                                                                                                                                                                                                                                                                                                                                                                                      |
| 伦理审查方式      | <input checked="" type="checkbox"/> 会议审查 <input type="checkbox"/> 快速审查                                                                                                                                                                                                                                                                                                                                                                   |
| 审查委员        | 本次会议 10 位委员出席, 有 10 位委员参加该项目投票                                                                                                                                                                                                                                                                                                                                                                                                           |
| 审查意见        | <p>1. 经本伦理审查委员会审查, 同意进行该项临床研究。<br/>意见和建议: <input checked="" type="checkbox"/>无 <input type="checkbox"/>有。</p> <p>2. 跟踪审查日期: 2015 年 10 月 22 日; 伦理委员会有权根据实际情况改变跟踪审查频度;</p> <p>3. 本批准函有效期: 2014 年 10 月 22 日至 2015 年 10 月 21 日。</p>                                                                                                                                                                                                          |
| 同意。         | <p>主任委员/副主任委员签字: 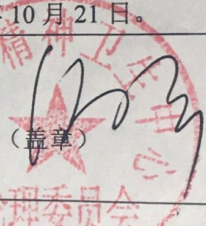</p> <p>上海市精神卫生中心伦理委员会 (盖章)</p> <p>日期: 2014 年 10 月 22 日</p>                                                                                                                                                                                                                                                                         |
| 注意: (请仔细阅读) | <p>1. 本批件将在各中心机构及其伦理委员会备案。如果对方案在贵机构的可行性(包括研究者的资格和经验、设备和条件等)有不同意见, 请及时与本伦理委员会联系。</p> <p>2. 已批准项目须遵循本伦理委员会批准的方案执行, 须符合 SFDA/GCP 和《赫尔辛基宣言》的原则。</p> <p>3. 暂停/提前终止临床研究, 请及时通知伦理委员会。</p> <p>4. 发生严重不良事件及影响研究风险受益比的非预期事件, 须及时报告本伦理委员会。</p> <p>5. 对已批准的临床研究方案、知情同意书等材料的任何修改及主要研究者更换等, 须及时通知本伦理委员会重新审查, 获得批准后执行。</p> <p>6. 发现违反方案情况须及时报告。</p> <p>7. 根据伦理委员会对跟踪审查频度的意见, 无论试验开始与否, 请在跟踪审查日到期前 1 个月提出跟踪审查的申请。</p> <p>8. 完成临床研究, 须提交结题报告供伦理委员会审查。</p> |

IRB00002733-SHANGHAI MENTAL HLTH CTR IRB #1 IORG Number: IORG0002202  
FWA Number: FWA00003065 地址: 上海市宛平南路 600 号 邮编: 200030

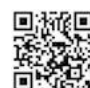

扫描全能王 创建
